# Supplementary material
Source: PubMed Central journal article supplement (PMC5568982)
Supplement: NIHMS864863-supplement-supplement.pdf [file NIHMS864863-supplement-supplement.pdf]

Figure 1: Supplementary material. Receiver operating curve (ROC) for each treatment arm. The point of optimal criterion, threshold that yields the optimal combination using the equality criteria of sensitivity and specificity for each curve is annotated. Area Under the Curve (AUC) and it's 95% Confidence Interval is also annotated at the bottom of each figure.

## Guidelines Based Therapy (GBT)

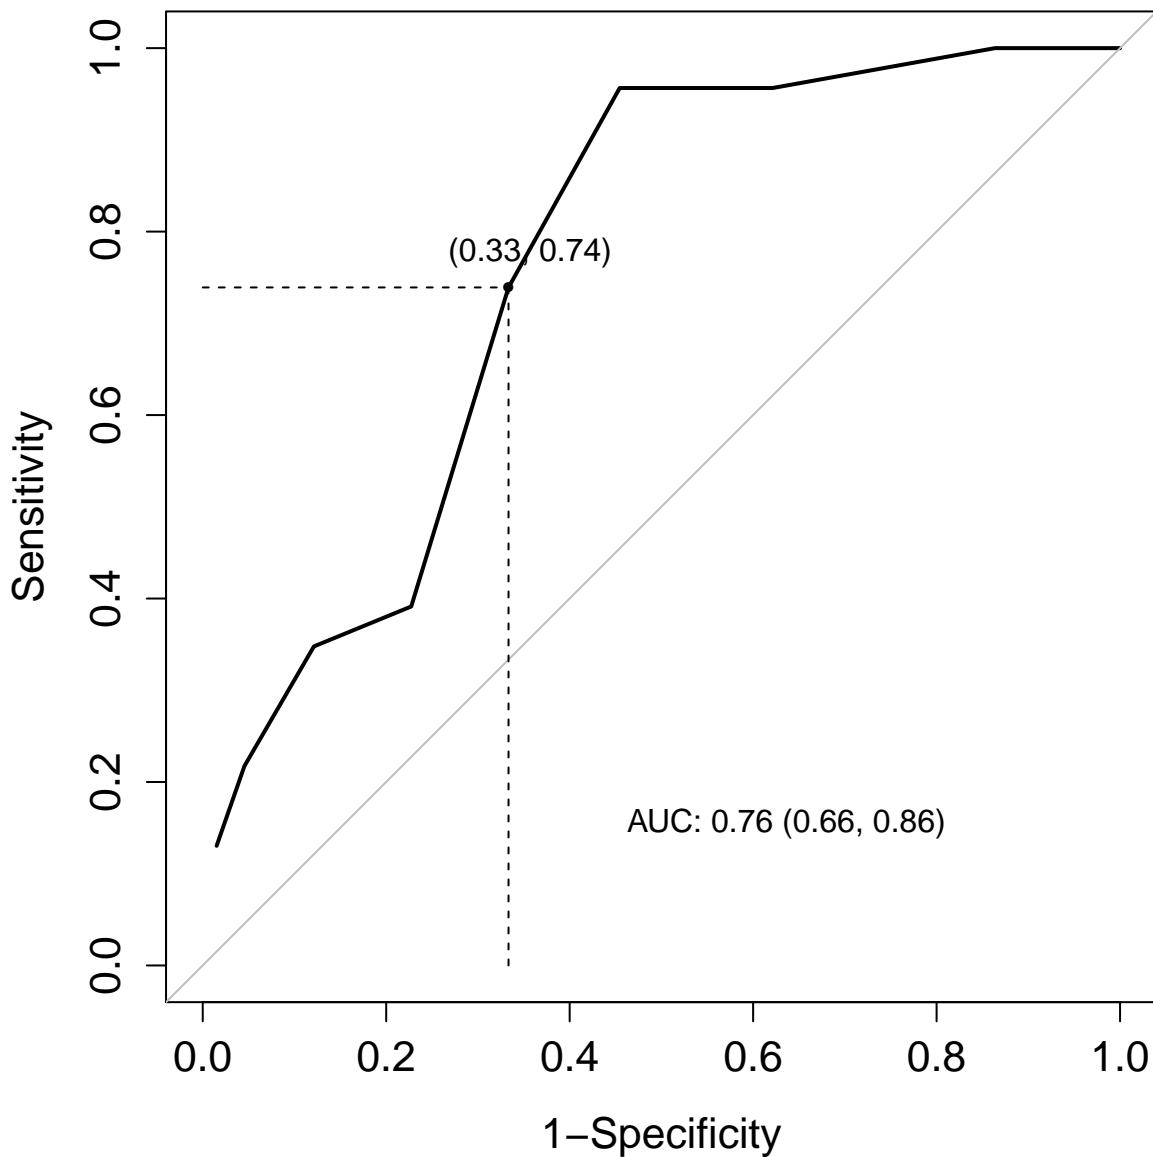

# GBT + Omalizumab

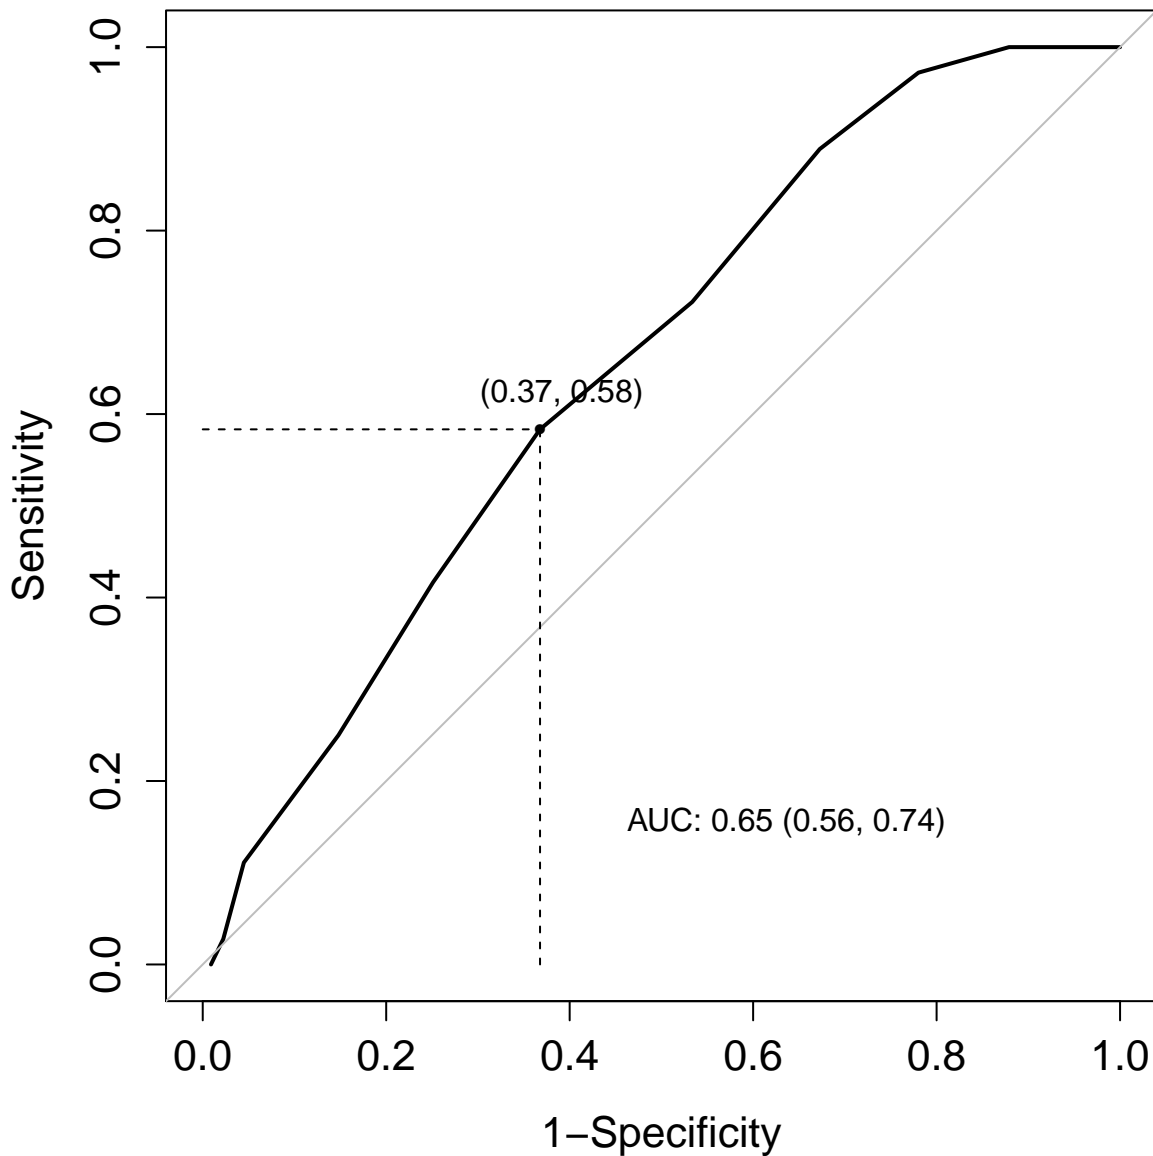

## Supplementary material

Table E1: saEPI scoring schema<sup>7</sup>

| Variable                                   | Baseline/Seasonal       | Low<br>(0 points) | Medium<br>(1 point) | High<br>(2 points) |
|--------------------------------------------|-------------------------|-------------------|---------------------|--------------------|
| Age at recruitment (y)                     | Baseline Characteristic | 13-20             |                     | 6-12               |
| Total IgE (kU/l)                           | Baseline Characteristic | 0-100             | 100-300             | >300               |
| Allergen skin tests (positive tests of 14) | Baseline Characteristic | 0-4               | 5-7                 | 8-14               |
| Blood eosinophils (%)                      | Baseline Characteristic | 0-2               | 2-6                 | 6-22               |
| Exacerbation in previous season            | Previous season         | No                |                     | Yes                |
| ICS (treatment steps)                      | Previous season         | Step 0-3          | Step 4-5            | Step 6             |
| FEV <sub>1</sub> /FVC ratio (x100)         | Previous season         | >85               | 75-85               | <75                |
| FeNO (ppb)                                 | Previous season         | 0-15              | 15-40               | >40                |

**Table E2 Comparison of models for predictors of fall exacerbations containing questionnaire, laboratory and specialist testing**

| Models | Variables                                                               | Comparison | Guidelines Based Therapy<br>(N=89)    |          | Guidelines Based Therapy<br>+ Omalizumab<br>(N=295) |          |
|--------|-------------------------------------------------------------------------|------------|---------------------------------------|----------|-----------------------------------------------------|----------|
|        |                                                                         |            | Area under the<br>ROC curve<br>95% CI | p-value  | Area under the<br>ROC curve<br>95% CI               | p-value  |
| M0     | Null model                                                              | --         |                                       | --       |                                                     | --       |
| M1     | Questionnaire:<br>- Age<br>- Previous exacerbations<br>- Treatment Step | vs. M0     | 0.73<br>(0.61, 0.85)                  | P < 0.01 | 0.69<br>(0.60, 0.77)                                | P < 0.01 |
| M2     | Laboratory:<br>- Total IgE<br>- Blood Eosinophils                       | vs. M1     | 0.81<br>(0.71, 0.90)                  | P < 0.01 | 0.69<br>(0.61, 0.78)                                | P = 0.74 |
| M3     | Specialist:<br>- Skin Test<br>- FEV1/FVC<br>- FeNO                      | vs. M2     | 0.82<br>(0.73, 0.91)                  | P = 0.83 | 0.71<br>(0.63, 0.79)                                | P = 0.27 |

Multivariate modeling using previously described predictors.

Likelihood-ratio chi-square tests were used to compare the fit of nested models and to provide a test of significance for the added variables to the model.
